# Supplementary material
Source: Research Square preprint supplement (doi:10.21203/rs.3.rs-9941512/v1)
Supplement: Supplementary file 1 [file 7bfd7376f3304e6b2606987a.pdf]

**Supplementary Table 1. Interaction tests between BMI measures, ethnicity, and sex on cardiometabolic risk factors.**

Values represent p-values derived from multivariable linear regression models. Models for BMI z-score interactions use continuous data, while BMI category interactions compare healthy weight, overweight, and obesity.

| <b>Outcome</b> | <b>BMI z-score x Ethnicity</b> | <b>BMI category x Ethnicity</b> | <b>BMI z-score x Ethnicity x Sex</b> |
|----------------|--------------------------------|---------------------------------|--------------------------------------|
| SBP            | 0.251                          | <0.001                          | 0.055                                |
| DBP            | 0.195                          | <0.001                          | 0.674                                |
| HbA1c          | 0.032                          | <0.001                          | 0.908                                |
| Non-HDLc       | 0.208                          | <0.001                          | 0.738                                |
| Triglycerides  | 0.385                          | <0.001                          | 0.626                                |

**Supplementary Table 2. Summary of cardiometabolic risk factors stratified by sex and ethnicity.**

Data are presented as mean (SD) or median (IQR). Comparisons between boys and girls within ethnic groups were performed using t-tests or Mann-Whitney U tests. Sample sizes vary between outcomes due to availability of blood pressure and blood biomarker measurements.

| Outcome                | All               |                   |         | White             |                   |         | South Asian       |                   |         |
|------------------------|-------------------|-------------------|---------|-------------------|-------------------|---------|-------------------|-------------------|---------|
|                        | Boys              | Girls             | p-value | Boys              | Girls             | p-value | Boys              | Girls             | p-value |
|                        | <b>n=3 576</b>    | <b>n=3 391</b>    |         | <b>n=1 451</b>    | <b>n=1 296</b>    |         | <b>n=2 125</b>    | <b>n=2 099</b>    |         |
| SBP (mmHg)             | 108.5 (11.5)      | 107.5 (11.6)      | <0.001  | 108.3 (11.1)      | 107.7 (11.4)      | 0.147   | 108.7 (11.8)      | 107.3 (11.7)      | <0.001  |
| DBP (mmHg)             | 67.4 (10.4)       | 67.5 (10.4)       | 0.421   | 66.0 (10.6)       | 66.4 (10.4)       | 0.380   | 68.2 (10.2)       | 68.3 (10.4)       | 0.952   |
|                        | <b>n=1 066</b>    | <b>n=947</b>      |         | <b>n=320</b>      | <b>n=306</b>      |         | <b>n=746</b>      | <b>n=641</b>      |         |
| HbA1c (mmol/mol)       | 35.85 (2.93)      | 35.84 (3.77)      | 0.964   | 34.55 (2.45)      | 34.50 (3.17)      | 0.849   | 36.39 (2.95)      | 36.46 (3.87)      | 0.705   |
| Non-HDLc (mmol/L)      | 2.77 (0.65)       | 2.83 (0.69)       | 0.047   | 2.67 (0.60)       | 2.82 (0.68)       | 0.003   | 2.81 (0.67)       | 2.83 (0.69)       | 0.601   |
| Triglycerides (mmol/L) | 0.95 (0.69, 1.37) | 1.06 (0.77, 1.47) | <0.001  | 0.93 (0.66, 1.22) | 1.09 (0.77, 1.48) | <0.001  | 0.98 (0.69, 1.46) | 1.04 (0.76, 1.45) | 0.051   |
